# Supplementary material for: The F0F1-ATP Synthase Complex Contains Novel Subunits and Is Essential for Procyclic Trypanosoma brucei
Source: PubMed Central journal article supplement (PMC2674945; doi:10.1371/journal.ppat.1000436), 2009-05-15

## SUPPLEMENTARY FIGURE S2

**S2. Fractionation of TAP\_sub *b* (A) and TAP\_sub  $\beta$  (B) TEV eluates on 10-30% glycerol gradients. Fractions were collected from the top of the gradients. Aliquots of odd-numbered fractions were analyzed by SDS-PAGE followed by Sypro Ruby staining. Numbers on the right indicate the position of individual subunits..**

**A**

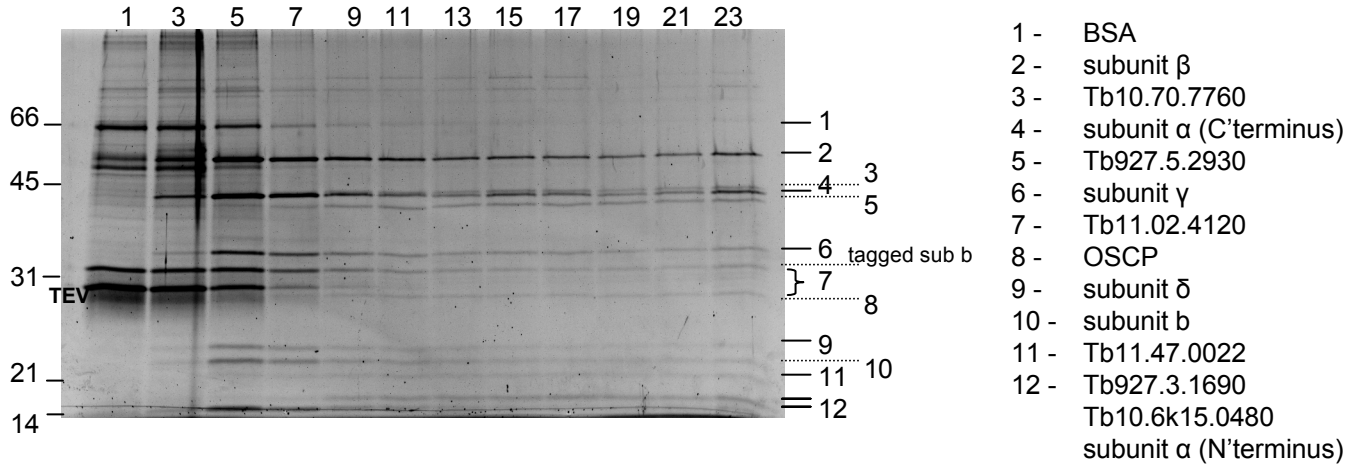

**B**

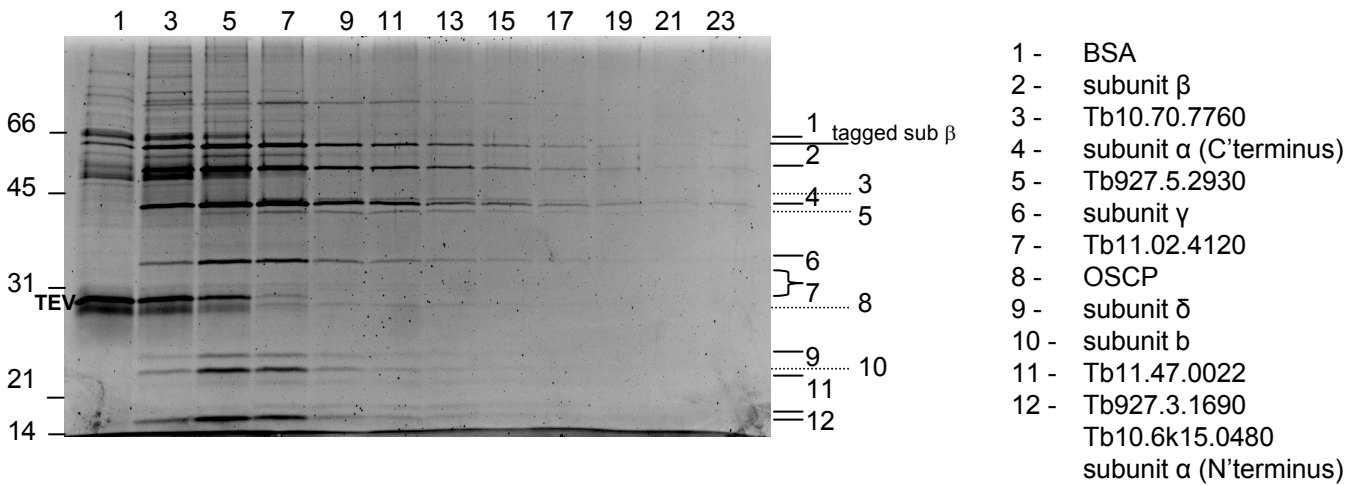

Supplement: ppat.1000436.s002.pdf [file ppat.1000436.s002.pdf]
