# Supplementary material for: The F0F1-ATP Synthase Complex Contains Novel Subunits and Is Essential for Procyclic Trypanosoma brucei
Source: PubMed Central journal article supplement (PMC2674945; doi:10.1371/journal.ppat.1000436), 2009-05-15
Supplement: ppat.1000436.s003.pdf [file ppat.1000436.s003.pdf]

### SUPPLEMENTARY FIGURE S3

#### S3. MS analysis of *T. brucei* ATP synthase subunit $\alpha$ .

In red is shown tryptic peptide identified in lower ~14kDa gel band. In blue are shown tryptic peptides in higher ~44kDa gel band. Underlined is sequenced, which was suggested as the site-specific cleavage site characteristic for all trypanosomatid species [36].

>Tb927.7.7420

MRRFGSKFASGLASRCALACPLASAATAPAGASTTSSSTSSAQKSFFKTTEMIGYVHSID  
GTIATLIPAPGNPGVAYNTIIQIQVSPTTFAAGLVFNLEKDGR **IGIILMDNITEVQSGQ**  
**KVMATGQLLHIPVGAGVLGK**VVNPLGHEVPVGLVTRSRLL/DSTLGKVDTGAPNIVSR  
**SPVNYNLLTGFK**AVDTMIPIGRGQRELI VGDRTGK**TSIAVSTIINQVR**INQQILSKNA  
VISIYVSIQRCNSVARIHRLQLSYGALRYTTVMAATAAEPAGLQYLAPYAGVTMGEYF  
MNRGRHCLCVYDDLKQAVAYRQISL L LRRPPGR**EAYPGDV FYLHSR**LLERAAMLSPGK  
GGGSVTALPIVETLSNDVTAYIVTNVISITDGQIYLDTKLFTGGQRPAVNI GLSVSRVG  
SSAQNAAMKGVAGKLGILAEYRKLAA SVGGQQVQTIPMIRGAR**FVALFNQK**QPSYFM  
NAIVSLYACLNGYLDDVKVQYVKFYEYLLVHRDLGIMYGTAKNKFFYMYVQELNYLIRF  
FTLNSPILHGELEEMLKQH~~THL~~FLQHYQSKMNAIKSEKDKALKNLLYSCKRAV
