# Supplementary material for: The F0F1-ATP Synthase Complex Contains Novel Subunits and Is Essential for Procyclic Trypanosoma brucei
Source: PubMed Central journal article supplement (PMC2674945; doi:10.1371/journal.ppat.1000436), 2009-05-15

## SUPPLEMENTARY FIGURE S4

**S4. Dot blot analysis of the glycerol gradient-fractionated cleared mitochondrial lysate showing the sedimentation profile of the oxidoreductase complex.** Fraction 1 is at the top of the gradient. 100ul aliquots of odd-numbered fractions were analyzed by Dot blot analysis and probed with monoclonal mAb52 antibody.

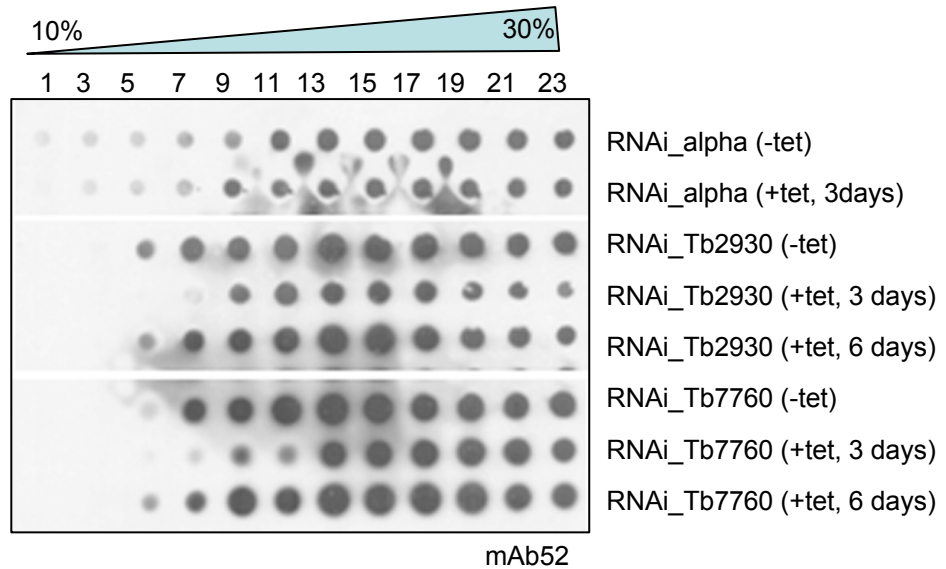

Supplement: ppat.1000436.s004.pdf [file ppat.1000436.s004.pdf]
